# Supplementary material for: Large dielectric constant, high acceptor density, and deep electron traps in perovskite solar cell material CsGeI3
Source: Royal Society of Chemistry journal article supplement (doi:10.1039/c6ta04685a), 2016-01-01
Supplement: c6ta04685a1.pdf [file c6ta04685a1.pdf]

## Supporting Information

# Large dielectric constant, high acceptor density, and deep electron traps in perovskite solar cell material CsGeI<sub>3</sub>

Wenmei Ming<sup>1,†</sup>, Hongliang Shi<sup>1,2,†</sup> and Mao-Hua Du<sup>1</sup>

<sup>1</sup>Materials Science & Technology Division and Center for Radiation Detection Materials and  
Systems, Oak Ridge National Laboratory, Oak Ridge, TN 37831, USA

<sup>2</sup>School of Physics and Nuclear Energy Engineering, Beihang University, Beijing 100191, China

### AUTHOR INFORMATION

#### Corresponding Author

Mao-Hua Du ([mhdu@ornl.gov](mailto:mhdu@ornl.gov))

<sup>†</sup> These authors contribute equally to this work.

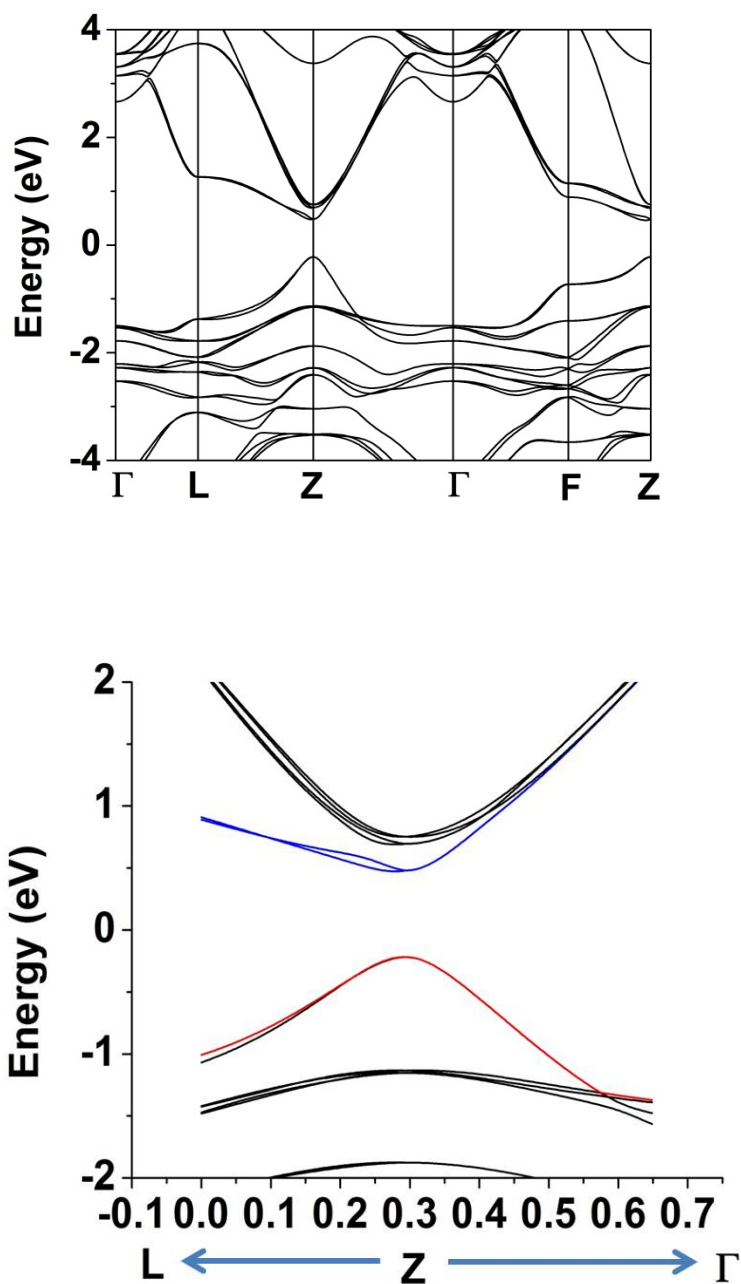

The top panel shows that band structure of CsGeI<sub>3</sub>; the bottom panel is the band structure zoomed in near the Z point. The band structure is calculated using the PBE functionals including the spin-orbit coupling.
